# Supplementary material for: Investigating the impact of electrical stimulation temporal distribution on cortical network responses
Source: BMC Neurosci. 2017 Jun 12;18:49. doi: 10.1186/s12868-017-0366-z (PMC5469148; doi:10.1186/s12868-017-0366-z)
Supplement: Supplementary file 2 — Additional file 2. File containing all data used to compute the statistical distributions reported in Figs. 2, 3, 4, and 5 and shown as box plots and bar-graphs. [file 12868_2017_366_MOESM2_ESM.xlsx]

## Sheet: Figure 2
Panel B1								Panel B2
STIM1	Beta0	Beta0,5	Beta1	Beta1,5	BetaInf			STIM2	Beta0	Beta0,5	Beta1	Beta1,5	BetaInf
N of evoked spikes	16.8399	17.2127	15.5996	16.1062	16.137			N of evoked spikes	16.3591	15.8795	16.2538	15.4626	16.8314
	26.8968	27.3786	28.5192	26.8856	29.3735				25.4817	23.9415	23.4578	24.6653	27.7079
	5.66733	5.79348	5.8796	5.90806	6.00773				5.58181	5.33317	5.6836	5.32833	5.82949
	15.5368	15.1854	15.107	15.5399	13.3733				13.6686	13.8556	14.1778	13.7271	15.5746
	2.27373	2.32373	2.41944	2.76604	2.19				2.42479	2.36704	2.54556	2.42562	2.29353
	14.9419	13.5233	14.7843	12.9321	12.3205				16.1484	15.5697	12.5793	13.8042	15.6821
	9.08651	7.72394	9.145	8.38667	11.2662				10.4533	10.1164	9.74515	11.1112	12.1521
	10.8548	10.0943	10.1393	11.6379	12.5456				4.71101	8.94267	5.90322	7.48978	10.9273
	6.03301	5.18044	5.11011	4.43322	7.39978				5.39417	5.42011	5.71427	6.36115	5.49167
Panel C1								Panel C2
STIM1	Beta1 MBR/2	BetaInf MBR/2	Beta1 MBR	BetaInf MBR	Beta1 MFR	BetaInf MFR		STIM2	Beta1 MBR/2	BetaInf MBR/2	Beta1 MBR	BetaInf MBR	Beta1 MFR	BetaInf MFR
N of evoked spikes	10.2443	11.0792	9.56061	8.60781	5.23437	1.92955		N of evoked spikes	8.12238	7.77972	1.58392	8.61821	5.14083	5.53979
	6.08034	5.96443	4.03372	5.15762	2.99278	3.1066			7.81438	5.91711	7.05214	6.35556	3.58918	4.12834
	8.02797	11.5033	7.25637	14.1637	6.42734	4.55072			6.15757	8.57862	5.57382	6.27184	7.05878	5.13655
	6.25648	6.24919	5.76421	5.24053	5.09106	4.6844			4.95884	7.34032	4.08862	4.23656	4.99959	5.46061
	4.45926	6.04923	2.81847	4.56327	4.22953	3.97127			4.59034	6.84848	5.08571	6.01361	4.71971	4.56707
	10.0082	10.3381	11.6329	11.2565	6.048	6.00852			11.1448	11.6238	12.2661	9.47974	6.45308	5.85598
	3.41803	4.41768	3.16632	3.72112	2.83817	2.93617			6.04682	4.05331	2.86277	2.97706	3.638	2.23783
	8.06532	7.12838	3.61383	3.92498	3.15111	3.28236			6.88063	8.14302	4.83624	4.22808	3.35788	3.51404

## Sheet: Figure 3
Panel B
STIM1	PC T=2s									PC T=4s									PC T=8s									PC T=16s
Beta0	0.57126	0.87439	0.36952	0.41883	0.19387	0.56323	0.42477	0.43714	0.09236	0.44908	0.63762	0.16954	0.19573	0.04829	0.30367	0.23732	0.22417	0.03585	0.46536	0.56033	0.11145	0.1088	0.03234	0.25946	0.20618	0.14287	0.02095	0.48426	0.65452	0.24643	0.09086	0.05716	0.23478	0.38344	0.13888	0.00314
Beta0,5	0.60005	0.89537	0.37779	0.45778	0.24079	0.53101	0.28362	0.39999	0.03995	0.44933	0.66279	0.20055	0.38577	0.03786	0.31414	0.07717	0.16313	0.04154	0.46097	0.64285	0.20522	0.421	0.01157	0.29727	0.0903	0.21038	0.02364	0.57314	0.72474	0.34658	0.42281	0.06936	0.34625	0.26	0.36827	-0.0208
Beta1	0.57403	0.86518	0.37499	0.41717	0.24005	0.56638	0.40084	0.40486	0.06346	0.34938	0.56319	0.24584	0.17991	0.04499	0.24073	0.12454	0.17564	0.05534	0.45725	0.64671	0.29691	0.15779	0.02929	0.24513	0.10519	0.21456	0.11373	0.63866	0.79754	0.46242	0.17812	0.02147	0.38912	0.21635	0.38223	0.19074
Beta1,5	0.56108	0.82374	0.33323	0.40301	0.25922	0.51786	0.31554	0.49841	0.02718	0.26359	0.43902	0.20967	0.25382	0.14475	0.18614	0.14687	0.28535	0.02112	0.33249	0.48742	0.26981	0.28695	0.17156	0.20181	0.18126	0.4035	0.04645	0.51555	0.61246	0.45242	0.32119	0.25863	0.34802	0.37935	0.61469	0.10101
BetaInf	0.61886	0.82043	0.32457	0.36502	0.24061	0.46919	0.50211	0.49828	0.11449	0.08489	0.17112	0.03964	0.03412	0.02409	0.06156	0.06963	0.06218	0.01262	0.07364	0.17484	0.04796	0.02555	0.00459	0.0564	0.06371	0.04013	0.02532	0.20091	0.43101	0.1534	0.06202	0.04933	0.17382	0.22826	0.15587	0.09153
Panel C
STIM1	Beta0	Beta0,5	Beta1	Beta1,5	BetaInf
PC (T = [4, 8, 16] s)	0.44908	0.44933	0.34938	0.26359	0.08489
	0.63762	0.66279	0.56319	0.43902	0.17112
	0.16954	0.20055	0.24584	0.20967	0.03964
	0.19573	0.38577	0.17991	0.25382	0.03412
	0.04829	0.03786	0.04499	0.14475	0.02409
	0.30367	0.31414	0.24073	0.18614	0.06156
	0.23732	0.07717	0.12454	0.14687	0.06963
	0.22417	0.16313	0.17564	0.28535	0.06218
	0.03585	0.04154	0.05534	0.02112	0.01262
	0.46536	0.46097	0.45725	0.33249	0.07364
	0.56033	0.64285	0.64671	0.48742	0.17484
	0.11145	0.20522	0.29691	0.26981	0.04796
	0.1088	0.421	0.15779	0.28695	0.02555
	0.03234	0.01157	0.02929	0.17156	0.00459
	0.25946	0.29727	0.24513	0.20181	0.0564
	0.20618	0.0903	0.10519	0.18126	0.06371
	0.14287	0.21038	0.21456	0.4035	0.04013
	0.02095	0.02364	0.11373	0.04645	0.02532
	0.48426	0.57314	0.63866	0.51555	0.20091
	0.65452	0.72474	0.79754	0.61246	0.43101
	0.24643	0.34658	0.46242	0.45242	0.1534
	0.09086	0.42281	0.17812	0.32119	0.06202
	0.05716	0.06936	0.02147	0.25863	0.04933
	0.23478	0.34625	0.38912	0.34802	0.17382
	0.38344	0.26	0.21635	0.37935	0.22826
	0.13888	0.36827	0.38223	0.61469	0.15587
	0.00314	-0.0208	0.19074	0.10101	0.09153
Panel D
β values	# of stimulation sessions
Beta0	4
Beta0,5	3
Beta1	9
Beta1,5	2
BetaInf	0

## Sheet: Figure 4
Panel A1										Panel A2										Panel B
STIM1	Beta1 T=2s	Beta1 T=4s	Beta1 T=8s	Beta1 T=16s	BetaInf T=2s	BetaInf T=4s	BetaInf T=8s	BetaInf T=16s		STIM1	Beta1 T=2s	Beta1 T=4s	Beta1 T=8s	Beta1 T=16s	BetaInf T=2s	BetaInf T=4s	BetaInf T=8s	BetaInf T=16s		STIM1	Beta1 MSR<0,2	BetaInf MSR<0,2	Beta1 MSR>0,2	BetaInf MSR>0,2
PC MSR<0,2 Hz	0.4898	0.517	0.5135	0.4505	0.5339	0.5341	0.5082	0.4337		PC MSR>0,2 Hz	0.6646	0.5224	0.1762	0.2842	0.6363	0.5275	0.1031	0.2298		PC (all T)	0.4898	0.5339	0.6646	0.6363
	0.5943	0.5964	0.5842	0.6001	0.5727	0.5614	0.5747	0.5389			0.4617	0.2875	0.0349	0.0754	0.476	0.305	0.0534	0.1397			0.5943	0.5727	0.4617	0.476
	0.2344	0.2298	0.2189	0.1395	0.4542	0.4118	0.3357	0.2225			0.5111	0.2533	0.2292	0.3984	0.0427	0.0418	0.1415	0.351			0.2344	0.4542	0.5111	0.0427
	0.6842	0.6259	0.495	0.1947	0.5888	0.5166	0.3796	0.1665			0.7676	0.6262	0.1076	0.2256	0.8437	0.7316	0.1446	0.3623			0.6842	0.5888	0.7676	0.8437
	0.1592	0.0882	-0.0143	-0.0203	0.2151	0.184	0.1566	0.2175			0.2397	0.2427	0.3007	0.4411	0.0136	0.023	0.0483	0.1208			0.1592	0.2151	0.2397	0.0136
	0.308	0.225	0.1325	0.1721	0.3313	0.2743	0.1687	0.1346			0.5537	0.2678	0.2647	0.3961	0.5647	0.1435	0.1609	0.3382			0.308	0.3313	0.5537	0.5647
	0.2659	0.2533	0.213	0.1729	0.2929	0.2593	0.2336	0.1961			0.4721	0.2678	0.266	0.3761	0.458	0.124	0.0696	0.1441			0.2659	0.2929	0.4721	0.458
	0.3543	0.3395	0.3412	0.3095	0.3046	0.2635	0.2492	0.2591			0.1652	0.2097	0.2877	0.3939	0.0521	0.0835	0.1403	0.2663			0.3543	0.3046	0.1652	0.0521
	0.6268	0.5939	0.5033	0.2385	0.5185	0.4959	0.437	0.2528			0.3998	0.2489	0.1431	0.2636	0.3455	0.1859	0.0634	0.1274			0.6268	0.5185	0.3998	0.3455
	0.5456	0.5158	0.4323	0.3314	0.6419	0.6293	0.5916	0.5607			0.1619	0.0071	0.0105	0.0435	0.1942	0.027	0.0214	0.0737			0.5456	0.6419	0.1619	0.1942
	0.3332	0.2631	0.1431	0.1363	0.7293	0.6323	0.3499	0.155			0.574	0.3494	0.4572	0.6387	0.6189	0.0849	0.0736	0.2009			0.3332	0.7293	0.574	0.6189
	0.1214	0.1009	0.12	0.098	0.2326	0.1941	0.1752	0.1159			0.8652	0.5632	0.6467	0.7975	0.8204	0.1711	0.1748	0.431			0.1214	0.2326	0.8652	0.8204
	0.3227	0.3085	0.2563	0.2099	0.4521	0.4113	0.3013	0.0697			0.375	0.2458	0.2969	0.4624	0.3246	0.0396	0.048	0.1534			0.3227	0.4521	0.375	0.3246
	0.2518	0.268	0.2057	0.0291	0.2232	0.1754	0.1489	0.136			0.5289	0.2298	0.2423	0.3414	0.0698	0.0095	0.0317	0.0908			0.2518	0.2232	0.5289	0.0698
											0.4172	0.1799	0.1578	0.1781	0.365	0.0341	0.0255	0.062			0.517	0.5341	0.4172	0.365
											0.24	0.045	0.0293	0.0215	0.2406	0.0241	0.0046	0.0493			0.5964	0.5614	0.24	0.2406
											0.5664	0.2407	0.2451	0.3891	0.4692	0.0616	0.0564	0.1738			0.2298	0.4118	0.5664	0.4692
											0.4008	0.1245	0.1052	0.2164	0.5021	0.0696	0.0637	0.2283			0.6259	0.5166	0.4008	0.5021
											0.4049	0.1756	0.2146	0.3822	0.4983	0.0622	0.0401	0.1559			0.0882	0.184	0.4049	0.4983
											0.0635	0.0553	0.1137	0.1907	0.1145	0.0126	0.0253	0.0915			0.225	0.2743	0.0635	0.1145
											0.5251	0.2426	0.292	0.4647	0.551	0.0776	0.0777	0.2644			0.2533	0.2593	0.5251	0.551
											0.8383	0.5531	0.6613	0.8471	0.8247	0.1754	0.1711	0.3723			0.3395	0.2635	0.8383	0.8247
											0.3472	0.2281	0.2868	0.4254	0.3153	0.0394	0.0451	0.1478			0.5939	0.4959	0.3472	0.3153
											0.4912	0.2414	0.2657	0.371	0.4923	0.0561	0.0507	0.1307			0.5158	0.6293	0.4912	0.4923
											0.4311	0.1937	0.169	0.1766	0.3728	0.0396	0.0435	0.0863			0.2631	0.6323	0.4311	0.3728
											0.2162	0.0683	0.0827	0.1648	0.2327	0.0266	0.0243	0.0937			0.1009	0.1941	0.2162	0.2327
											0.4879	0.1677	0.1841	0.326	0.533	0.0699	0.0601	0.1877			0.3085	0.4113	0.4879	0.533
											0.466	0.2241	0.267	0.4557	0.4917	0.0656	0.0434	0.1897			0.268	0.1754	0.466	0.4917
											0.1748	0.113	0.1611	0.2935	0.4483	0.0589	0.0583	0.1831			0.5135	0.5082	0.1748	0.4483
											0.0319	0.0681	0.1273	0.2062	0.0504	0.0085	0.0447	0.1335			0.5842	0.5747	0.0319	0.0504
																					0.2189	0.3357	0.5224	0.5275
																					0.495	0.3796	0.2875	0.305
																					-0.0143	0.1566	0.2533	0.0418
																					0.1325	0.1687	0.6262	0.7316
																					0.213	0.2336	0.2427	0.023
																					0.3412	0.2492	0.2678	0.1435
																					0.5033	0.437	0.2678	0.124
																					0.4323	0.5916	0.2097	0.0835
																					0.1431	0.3499	0.2489	0.1859
																					0.12	0.1752	0.0071	0.027
																					0.2563	0.3013	0.3494	0.0849
																					0.2057	0.1489	0.5632	0.1711
																					0.4505	0.4337	0.2458	0.0396
																					0.6001	0.5389	0.2298	0.0095
																					0.1395	0.2225	0.1799	0.0341
																					0.1947	0.1665	0.045	0.0241
																					-0.0203	0.2175	0.2407	0.0616
																					0.1721	0.1346	0.1245	0.0696
																					0.1729	0.1961	0.1756	0.0622
																					0.3095	0.2591	0.0553	0.0126
																					0.2385	0.2528	0.2426	0.0776
																					0.3314	0.5607	0.5531	0.1754
																					0.1363	0.155	0.2281	0.0394
																					0.098	0.1159	0.2414	0.0561
																					0.2099	0.0697	0.1937	0.0396
																					0.0291	0.136	0.0683	0.0266
																							0.1677	0.0699
																							0.2241	0.0656
																							0.113	0.0589
																							0.0681	0.0085
																							0.1762	0.1031
																							0.0349	0.0534
																							0.2292	0.1415
																							0.1076	0.1446
																							0.3007	0.0483
																							0.2647	0.1609
																							0.266	0.0696
																							0.2877	0.1403
																							0.1431	0.0634
																							0.0105	0.0214
																							0.4572	0.0736
																							0.6467	0.1748
																							0.2969	0.048
																							0.2423	0.0317
																							0.1578	0.0255
																							0.0293	0.0046
																							0.2451	0.0564
																							0.1052	0.0637
																							0.2146	0.0401
																							0.1137	0.0253
																							0.292	0.0777
																							0.6613	0.1711
																							0.2868	0.0451
																							0.2657	0.0507
																							0.169	0.0435
																							0.0827	0.0243
																							0.1841	0.0601
																							0.267	0.0434
																							0.1611	0.0583
																							0.1273	0.0447
																							0.2842	0.2298
																							0.0754	0.1397
																							0.3984	0.351
																							0.2256	0.3623
																							0.4411	0.1208
																							0.3961	0.3382
																							0.3761	0.1441
																							0.3939	0.2663
																							0.2636	0.1274
																							0.0435	0.0737
																							0.6387	0.2009
																							0.7975	0.431
																							0.4624	0.1534
																							0.3414	0.0908
																							0.1781	0.062
																							0.0215	0.0493
																							0.3891	0.1738
																							0.2164	0.2283
																							0.3822	0.1559
																							0.1907	0.0915
																							0.4647	0.2644
																							0.8471	0.3723
																							0.4254	0.1478
																							0.371	0.1307
																							0.1766	0.0863
																							0.1648	0.0937
																							0.326	0.1877
																							0.4557	0.1897
																							0.2935	0.1831
																							0.2062	0.1335

## Sheet: Figure 5
Panel A			Panel B
MSR	PC		MSR	PC
0.03957	0.51347		0.03939	0.50819
0.02576	0.58417		0.02576	0.57466
0.07879	0.21886		0.07879	0.33574
0.12424	0.49495		0.12443	0.3796
0.03788	-0.01435		0.03788	0.15661
0.13788	0.13252		0.13788	0.16872
0.05909	0.21298		0.05909	0.23364
0.05606	0.3412		0.05606	0.24918
0.07879	0.5033		0.07879	0.43703
0.05152	0.43235		0.05152	0.59158
0.15606	0.14311		0.15606	0.34986
0.24697	0.17621		0.24734	0.10311
0.07436	0.12002		0.07424	0.17517
0.27576	0.03488		0.27618	0.05343
0.11667	0.25631		0.11667	0.30129
0.11077	0.20569		0.11061	0.14892
0.3915	0.22925		0.39091	0.14154
0.25909	0.10761		0.25909	0.14459
0.97879	0.30069		1.02121	0.04829
0.42727	0.26469		0.42727	0.16091
0.39394	0.26599		0.39394	0.06958
1.18485	0.28772		1.20182	0.14033
0.30303	0.14306		0.30303	0.06342
0.4197	0.01049		0.4197	0.02135
0.5	0.45725		0.5	0.07364
0.5	0.64671		0.5	0.17484
0.5	0.29691		0.5	0.04796
0.5	0.24227		0.5	0.03165
0.5	0.15779		0.5	0.02555
0.5	0.02929		0.5	0.00459
0.5	0.24513		0.5	0.0564
0.5	0.10519		0.5	0.06371
0.5	0.21456		0.5	0.04013
0.5	0.11373		0.5	0.02532
0.5	0.29202		0.5	0.07767
0.5	0.66128		0.5	0.17108
0.5	0.28679		0.5	0.04513
0.5	0.26569		0.5	0.05073
0.5	0.169		0.5	0.04355
0.5	0.08274		0.5	0.02432
0.5	0.18411		0.5	0.06009
0.5	0.26704		0.5	0.04339
0.5	0.16115		0.5	0.05826
0.5	0.12734		0.5	0.04473
